# Supplementary material for: A new high-resolution groundwater isoscape for South-East Germany: insights from differences to precipitation
Source: Copernicus journal article supplement (doi:10.5194/egusphere-2024-1968), 2024-08-16
Supplement: Supplementary file 1 [file egusphere-2024-1968-supplement.pdf]

Table S1: Input parameters for the empirical Bayesian Kriging algorithm in ArcGIS Pro 2.9.0.

| Parameter                                | Value             |
|------------------------------------------|-------------------|
| Output cell size                         | 1375.868 m        |
| Data transformation type                 | None              |
| Semivariogram model type                 | Power             |
| Max number of points in each local model | 100               |
| Local model area overlap factor          | 1                 |
| Number of simulated semivariograms       | 100               |
| Search Neighborhood                      | Standard circular |
| Max Neighbors                            | 15                |
| Min Neighbors                            | 10                |
| Sectortype                               | 1                 |
| Angle                                    | 0                 |
| Radius                                   | 124879.519 m      |

Figure S1: Deuterium isoscape in groundwater

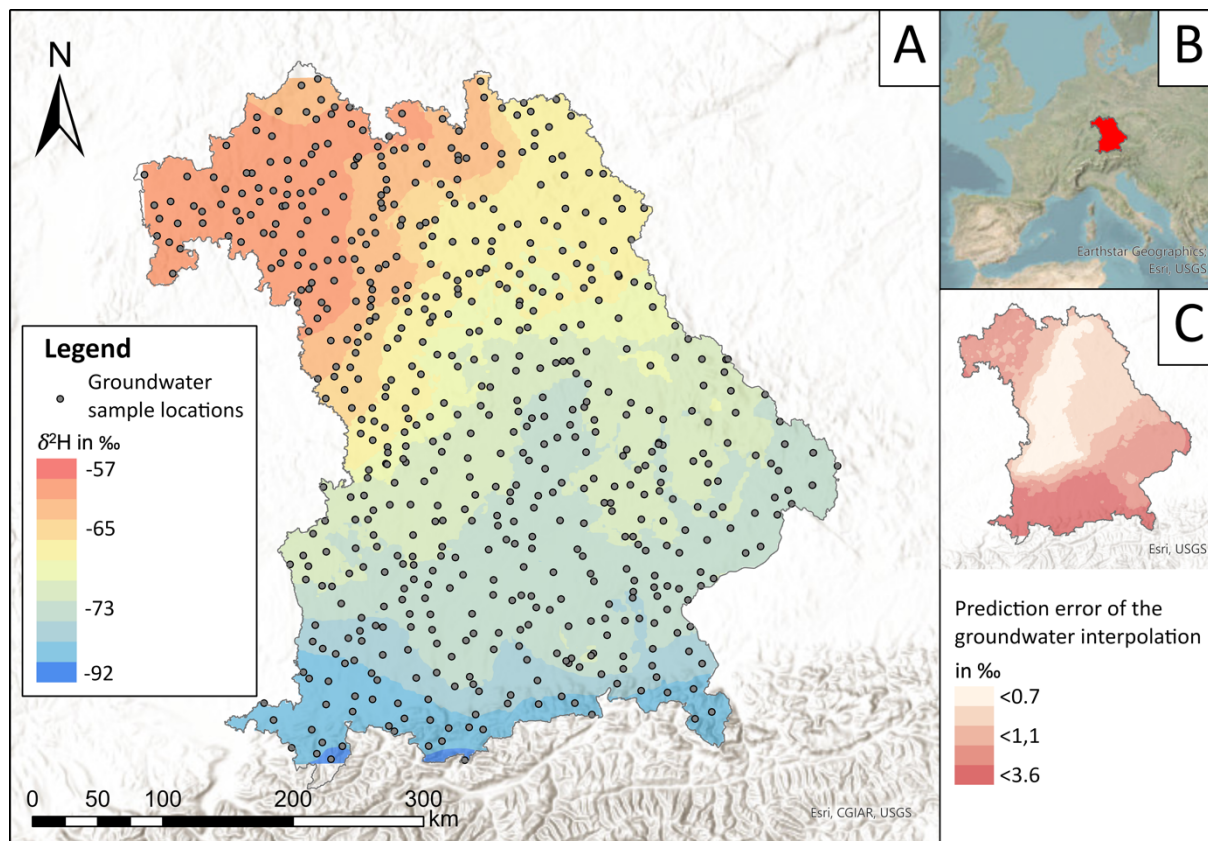

Figure 1: (a) groundwater  $\delta^2\text{H}$  isoscape with sample locations. (b) Location of the study area in Europe. (c) Standard error of the interpolation in %.

Figure S2: Oxygen-18 isoscape in Groundwater

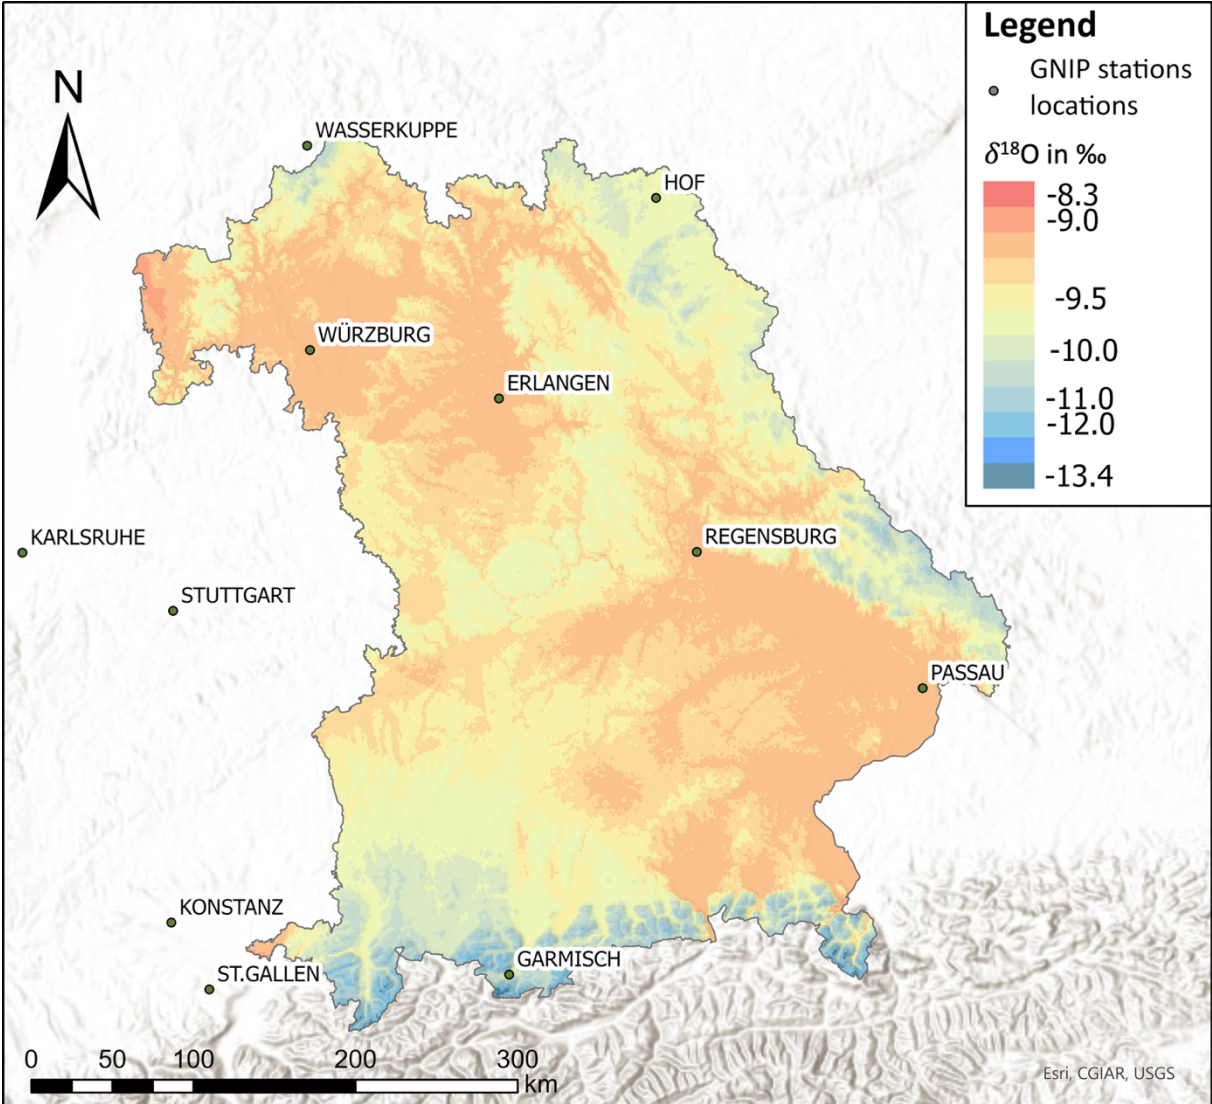

Figure 2: Isoscape (RCWIP model) of  $\delta^{18}\text{O}$ -values in precipitation and location of the 13 GNIP stations used for this study (isoscape adapted from Terzer et al. (2021)).
